# Supplementary material
Source: Royal Society of Chemistry journal article supplement (doi:10.1039/d6lp00109b)
Supplement: d6lp00109b1.pdf [file d6lp00109b1.pdf]

## Supplementary information

### Degradable Polyester Ternary Blends: Composition and Hybrid Compatibilization for Flexible Packaging

Matias Menossi<sup>1,2,§</sup>, Manushri Gunasekaran<sup>1,2,§</sup>, Ehsan Pesaranhajiabbas<sup>1,2</sup>, Amar K. Mohanty<sup>1,2,\*</sup>,  
Manjusri Misra<sup>1,2,\*</sup>

<sup>1</sup>Bioproducts Discovery and Development Centre, Department of Plant Agriculture, Crop Science Building, University of Guelph, Guelph, N1G 2W1 Ontario, Canada

<sup>2</sup>College of Engineering, Department of Interdisciplinary Engineering, Thornborough Building, University of Guelph, Guelph, N1G 2W1 Ontario, Canada

Corresponding Authors:

\*Manjusri Misra; Email: [mmisra@uoguelph.ca](mailto:mmisra@uoguelph.ca); ORCID: 0000-0003-2179-7699.

\*Amar K. Mohanty; Email: [mohanty@uoguelph.ca](mailto:mohanty@uoguelph.ca); ORCID: 0000-0002-1079-2481.

Matias Menossi; email: [mmenossi@uoguelph.ca](mailto:mmenossi@uoguelph.ca); ORCID: 0000-0002-6519-3152.

Ehsan Pesaranhajiabbas; email: [pesarane@uoguelph.ca](mailto:pesarane@uoguelph.ca)

Manushri Gunasekaran; email: [manusmriti99@gmail.com](mailto:manusmriti99@gmail.com)

<sup>§</sup>These authors contributed equally to this work.

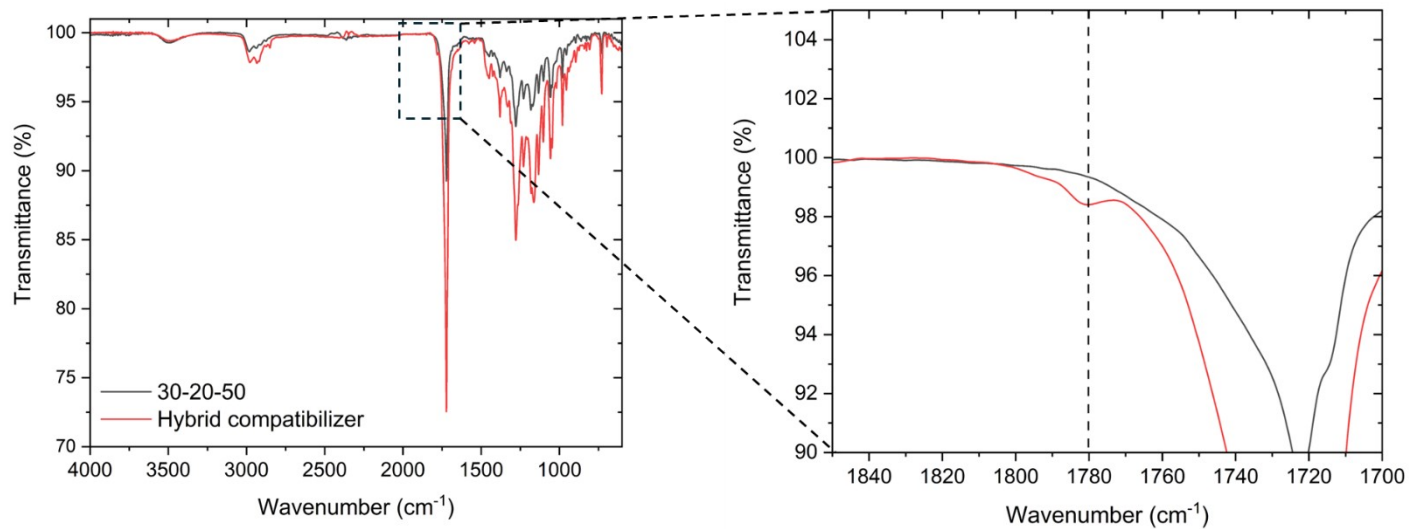

**Figure S.1.** FTIR spectra of sample 30-20-50, and the purified hybrid compatibilizer with highlighted samples in the range of 1850 to 1700  $\text{cm}^{-1}$ . The samples were identified as BioPBS-PBAT-PHBV-compatibilizer.

**Table S.1.** Surface tension ( $\gamma$ ) and the polar ( $\gamma^p$ ) and dispersive ( $\gamma^d$ ) components (mN/m) for water and diiodomethane.

| Liquid        | $\gamma$ | $\gamma^p$ | $\gamma^d$ |
|---------------|----------|------------|------------|
| Water         | 72.8     | 51.0       | 21.8       |
| Diiodomethane | 50.8     | 0.0        | 50.8       |

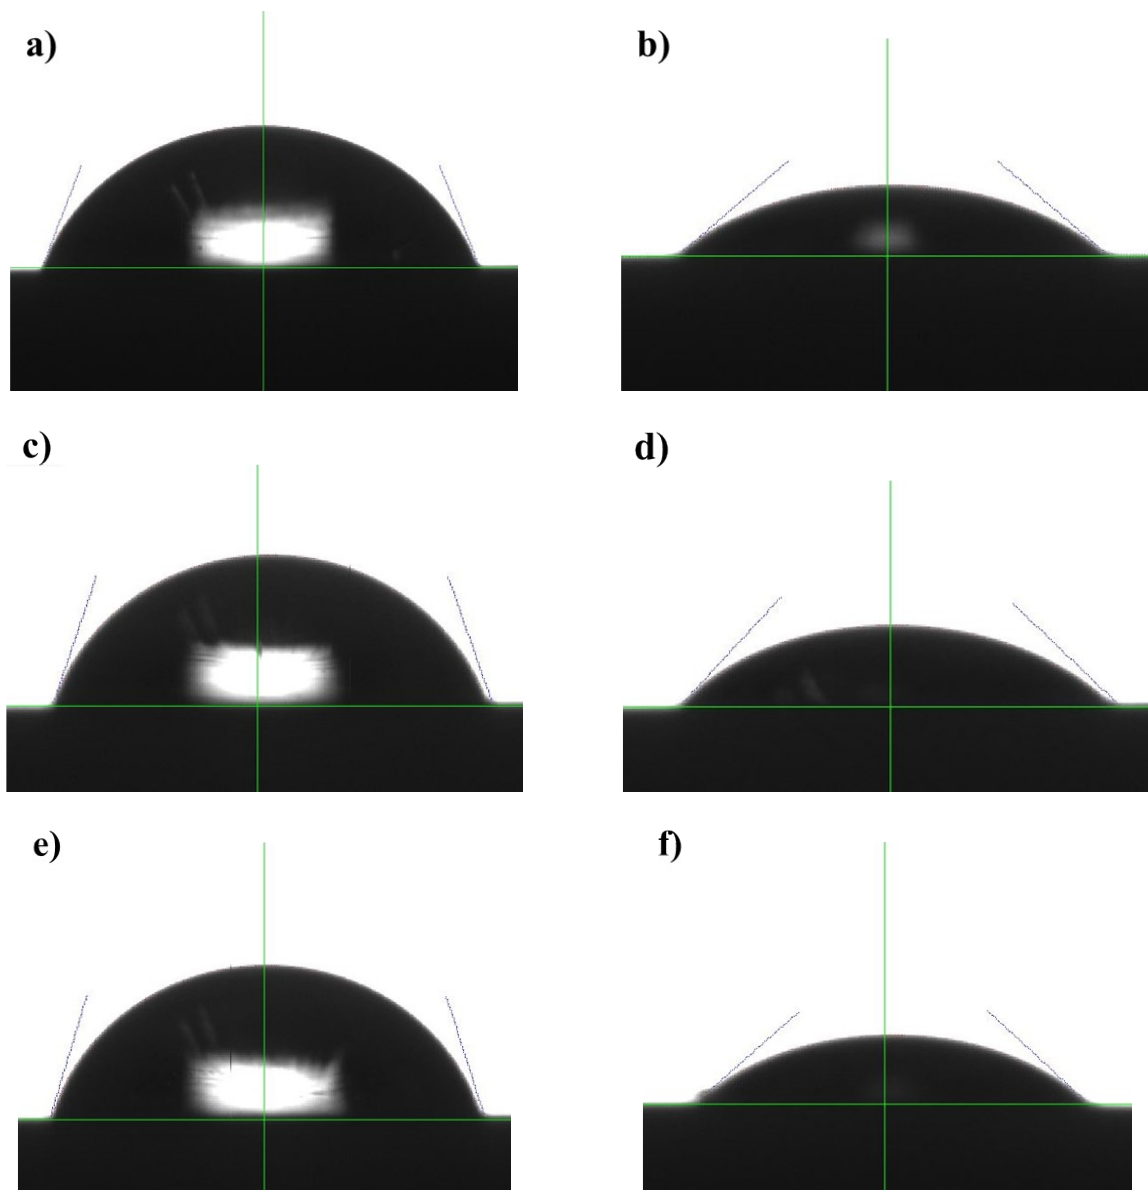

**Figure S.2.** Water contact angle of neat biodegradable polymers, a) neat PHBV, c) BioPBS, and e) PBAT. Diiodomethane contact angle of neat biodegradable polymers, b) neat PHBV, d) BioPBS, and f) PBAT.

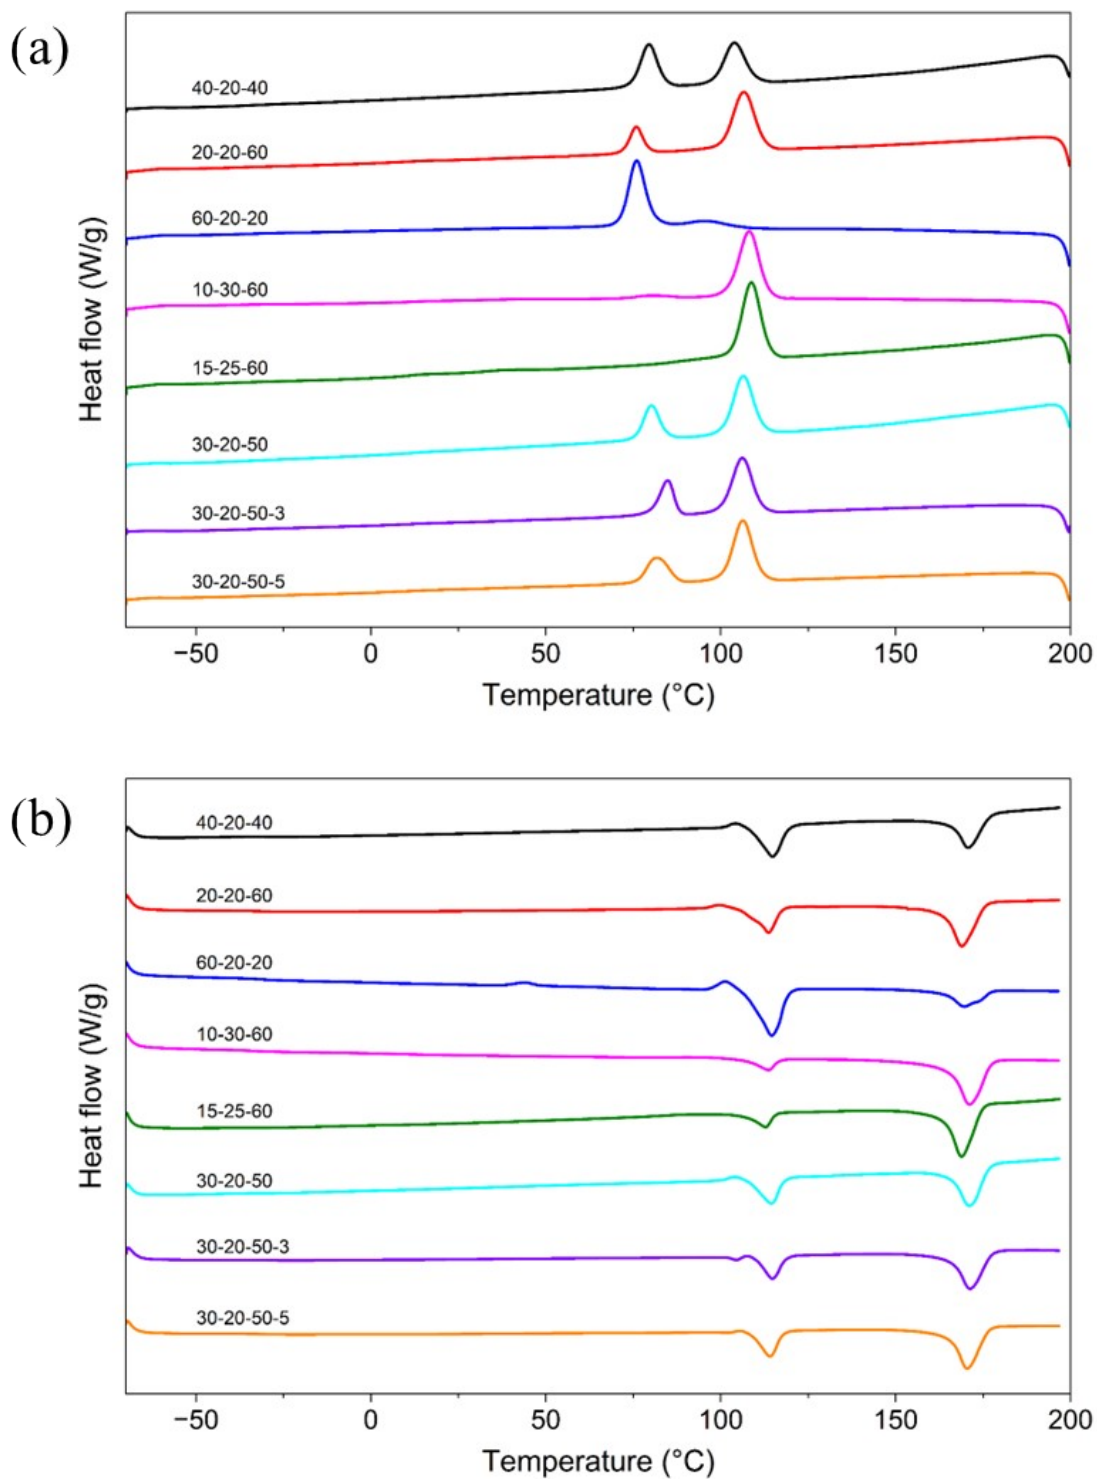

**Figure S.3.** DSC results for the ternary blends and neat polymers. A) Second heating cycle with labeled melting temperatures and the glass transition temperature; B) first cooling cycle with labeled crystallization temperature. The samples were identified as BioPBS-PBAT-PHBV-compatible.

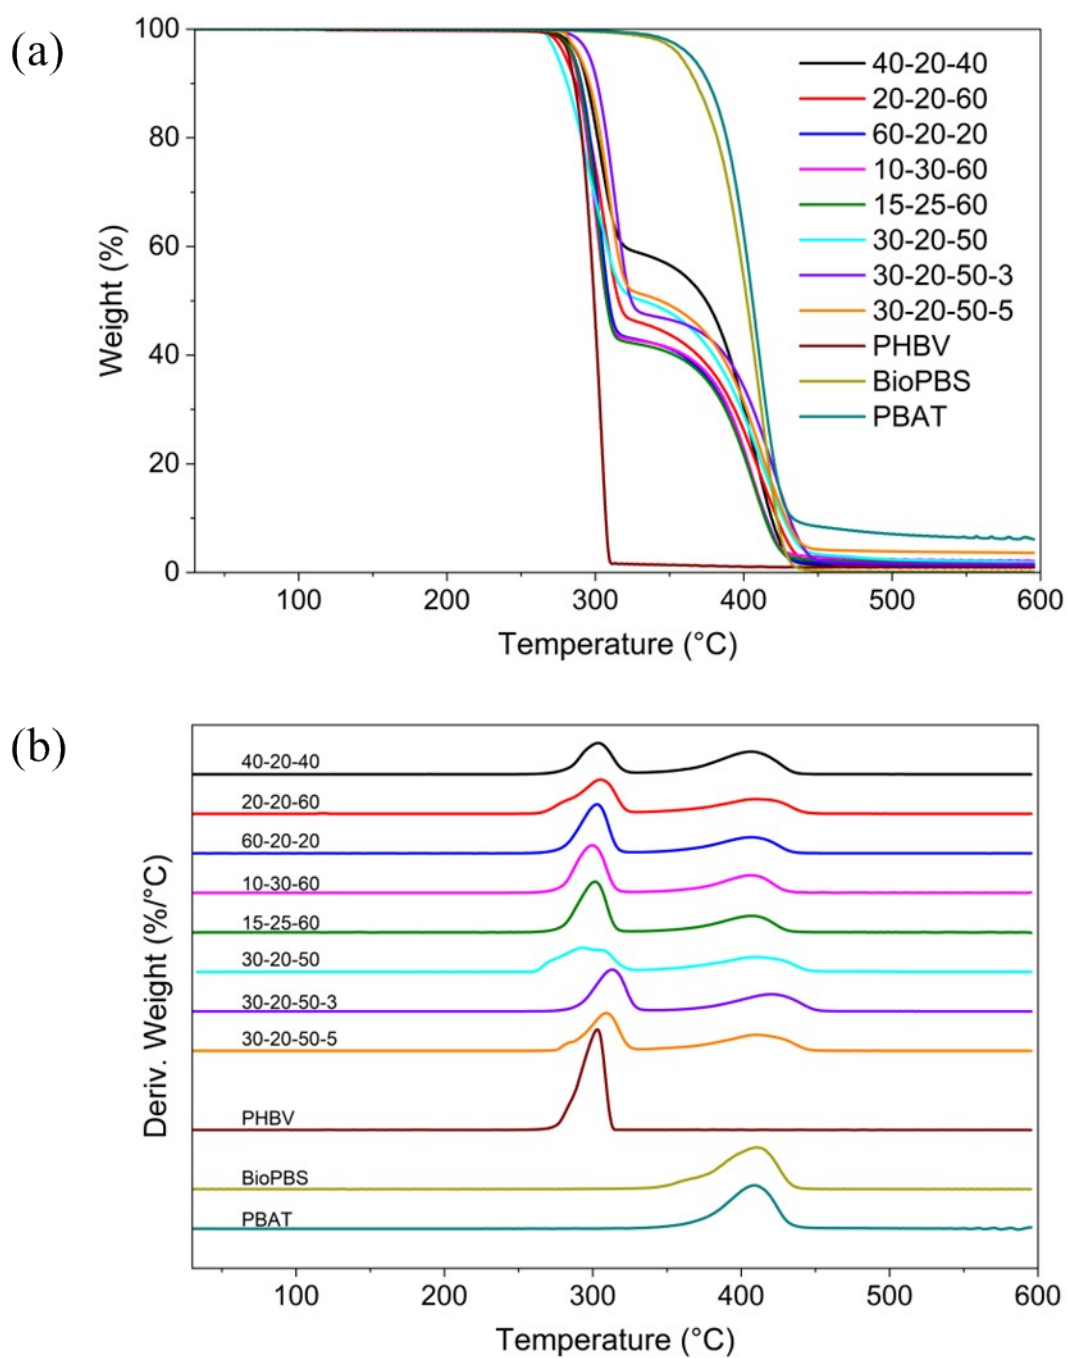

**Figure S.4.** Thermogravimetric Analysis (TGA) results. a) weight change as a function of temperature, and b) derivative weight change as a function of temperature for the ternary blends and neat polymers. The samples were identified as BioPBS-PBAT-PHBV-compatibilizer.

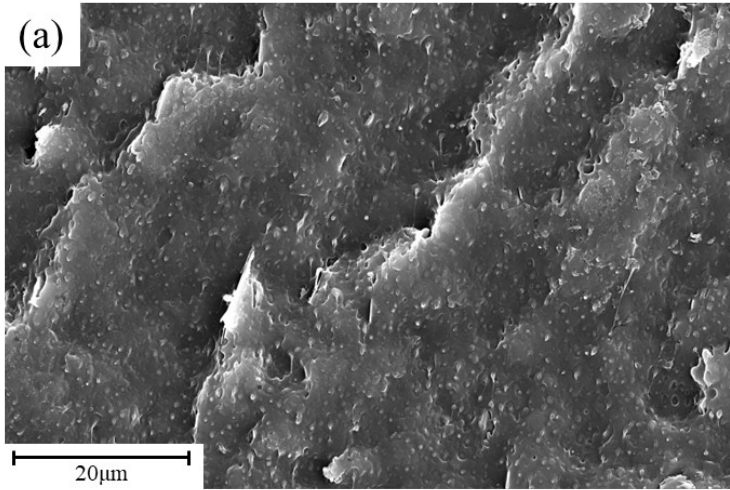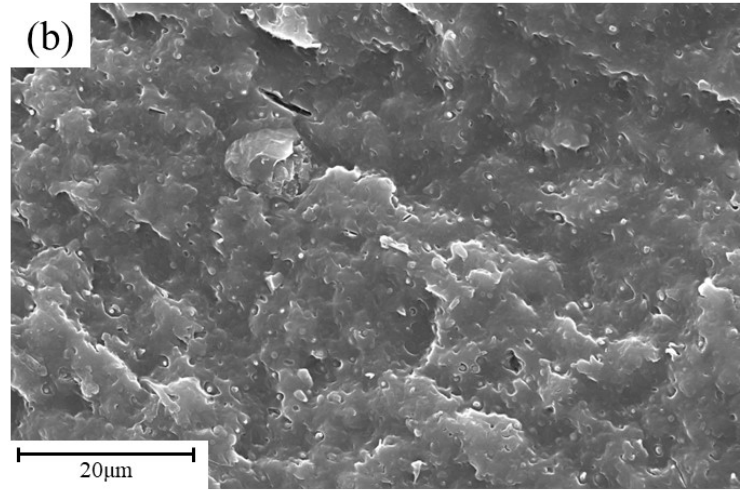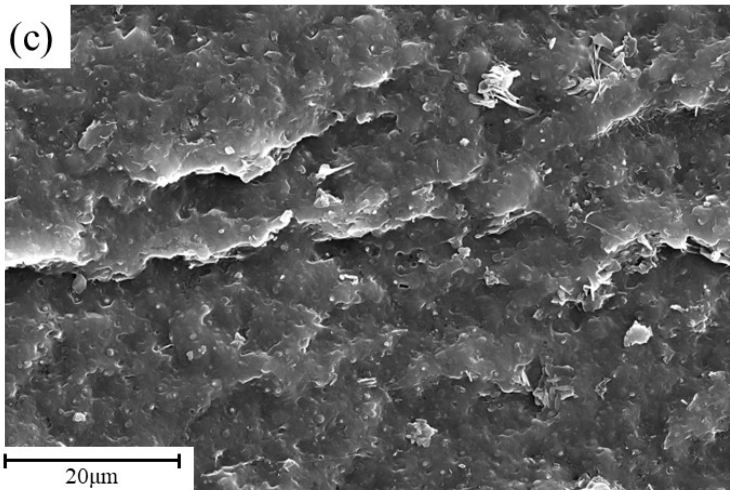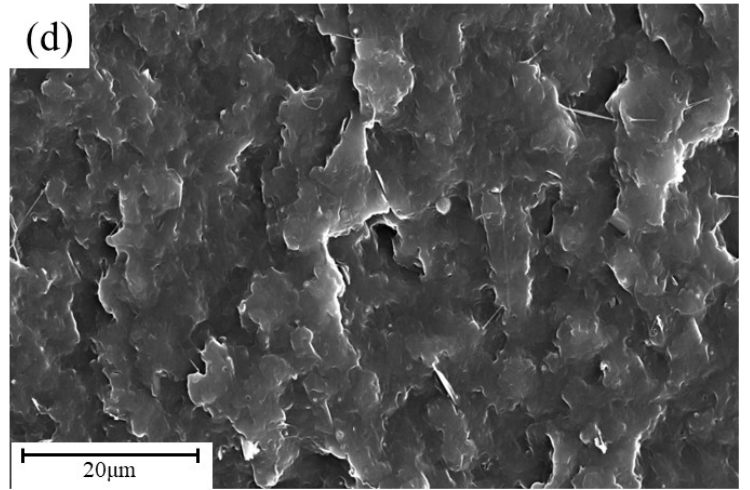

**Figure S.5.** Scanning Electron Microscopy Images of (a) Sample 10-30-60, (b) Sample 15-25-60, (c) Sample 60-20-20, (d) Sample 30-20-50-5. Magnification used in this work is 5000 $\times$ . The samples were identified as BioPBS-PBAT-PHBV-compatible.

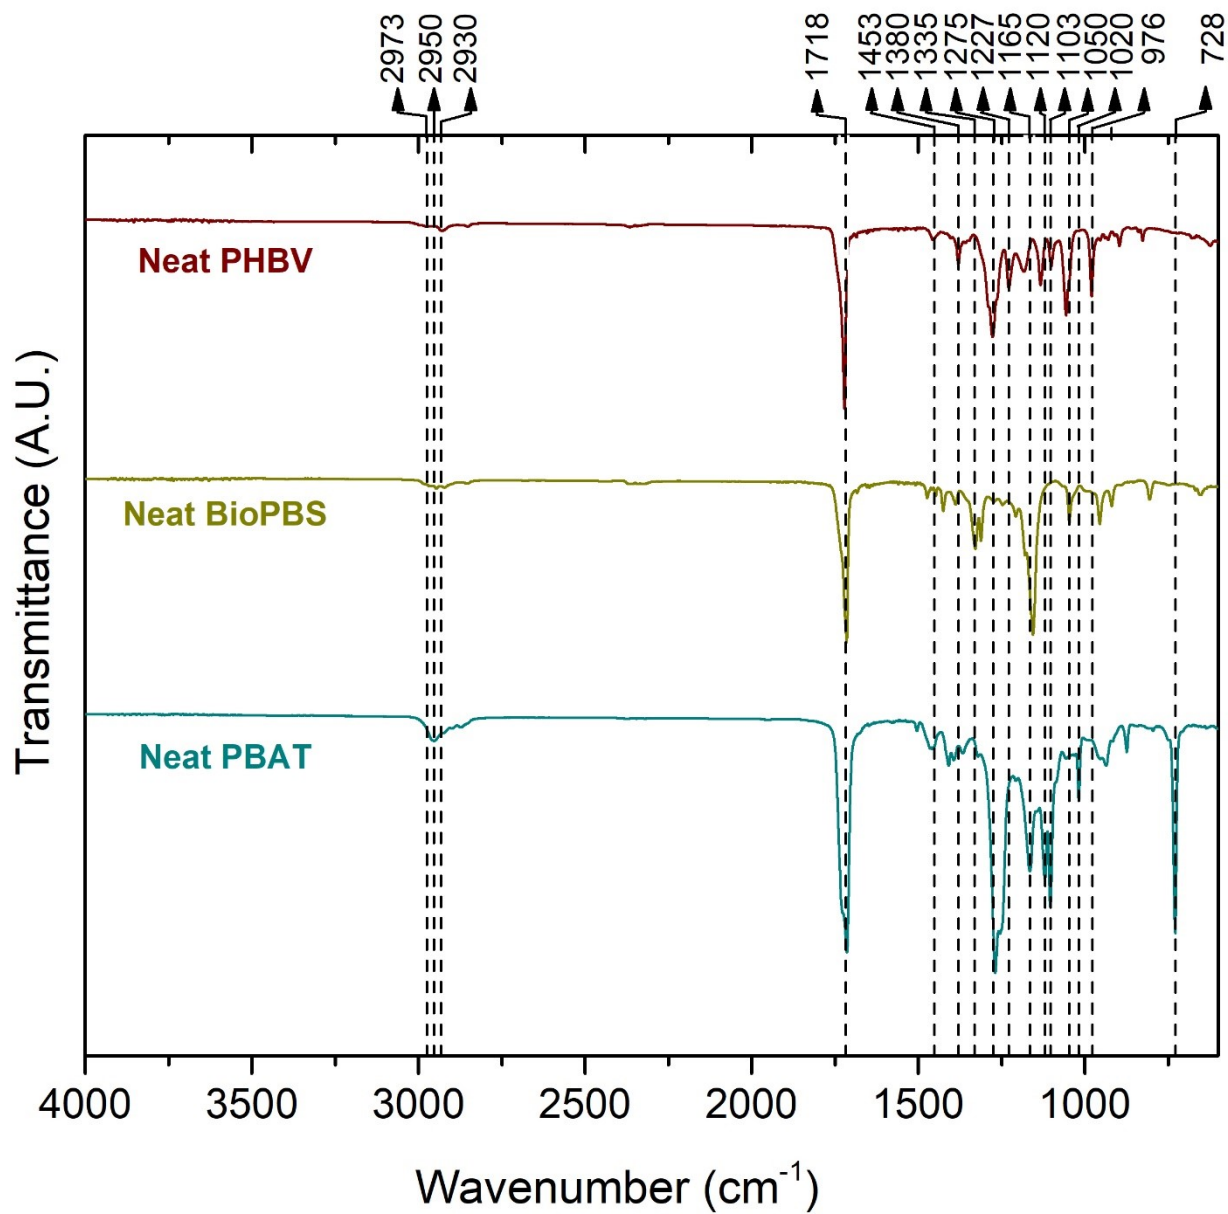

**Figure S.6.** Transmittance (AU) against wavenumber (cm<sup>-1</sup>) of neat polymer: PBAT, BioPBS, and PHBV.

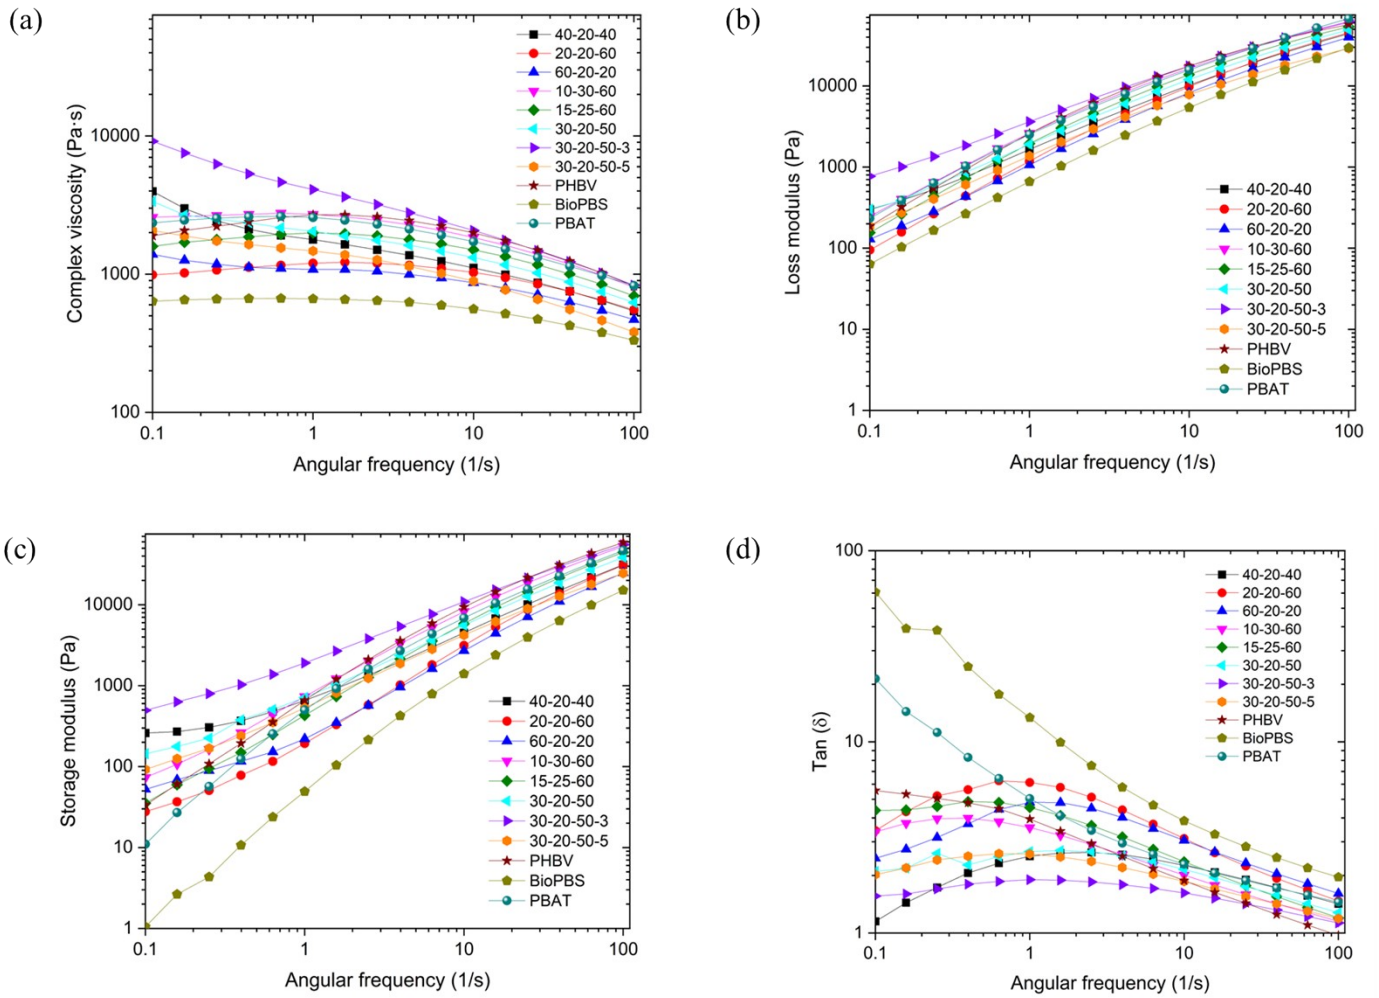

**Figure S.7.** Rheological properties of neat BiopBS, PBAT, PHBV, and their various blends; (a) storage modulus, (b) loss modulus, (c) complex viscosity, and (d) Tan ( $\delta$ ) of neat biopolymers, their non-compatible and compatibilized blends. The samples were identified as BioPBS-PBAT-PHBV-compatibilizer.

30-20-50-3 sample

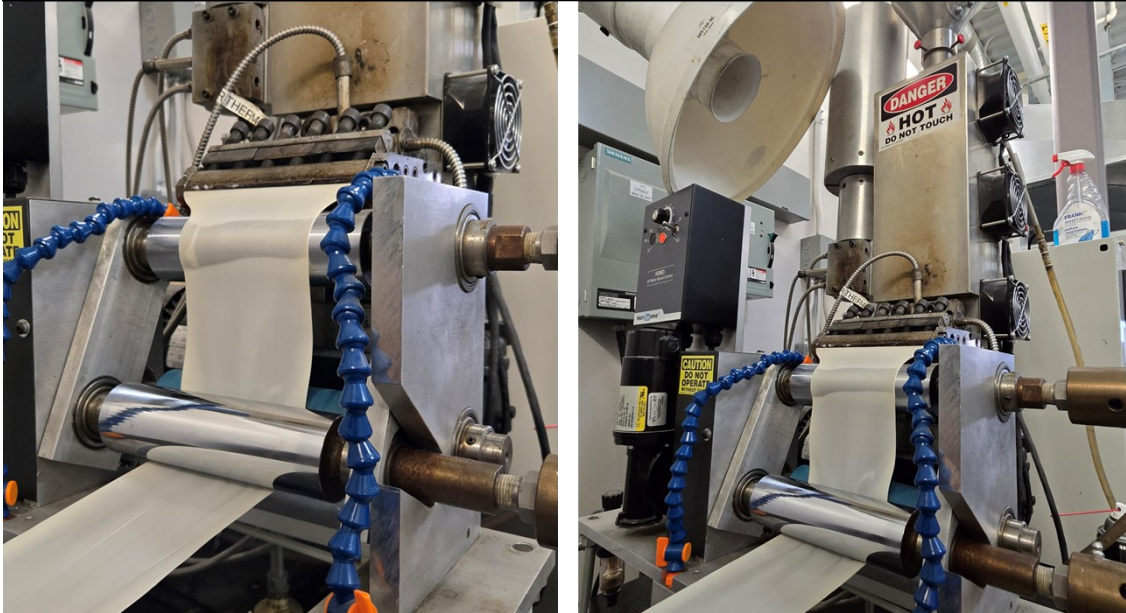

Figure S.8. 30-20-50-3 sample prepared by cast film extrusion.
